# Supplementary material for: Sleep and Executive Functioning in Pediatric Traumatic Brain Injury Survivors after Critical Care
Source: MDPI journal article supplement (doi:10.3390/children9050748), 2022-05-19
Supplement: s1 [file s1]

**Supplementary Table S1.** Comparison of analyzed cohort to those with missing or incomplete data for sleep questionnaire or cognitive measures.

|                                    | <b>All Analyzed<br/>N = 131 (%)</b> | <b>Missing/Incomplete<br/>N = 36 (%)</b> | <b><i>p</i>-value</b> |
|------------------------------------|-------------------------------------|------------------------------------------|-----------------------|
| Age, Median years (IQR)            | 11.5 (7.4, 13.8)                    | 13.6 (5.8, 16.6)                         | 0.17                  |
| Male sex                           | 78 (60%)                            | 20 (56%)                                 | 0.70                  |
| Race                               |                                     |                                          | 0.11                  |
| White                              | 94 (72%)                            | 22 (61%)                                 |                       |
| Asian                              | 5 (4%)                              | 0 (0%)                                   |                       |
| Pacific Islander                   | 3 (2%)                              | 0 (0%)                                   |                       |
| African American                   | 1 (1%)                              | 2 (6%)                                   |                       |
| American Indian or Alaska Native   | 1 (1%)                              | 2 (6%)                                   |                       |
| More than one race                 | 9 (7%)                              | 4 (11%)                                  |                       |
| Unknown or not reported            | 18 (14%)                            | 6 (17%)                                  |                       |
| Hispanic ethnicity                 | 13 (10%)                            | 11 (31%)                                 | 0.001                 |
| Pre-injury condition, any          | 38 (29%)                            | 12 (33%)                                 | 0.68                  |
| Critical Care intervention, any    | 61 (47%)                            | 24 (67%)                                 | 0.04                  |
| Inpatient rehabilitation discharge | 9 (7%)                              | 7 (19%)                                  | 0.02                  |
| Glasgow Coma Scale, Median (IQR)   | 15 (14, 15)                         | 14 (9,15)                                | 0.02                  |
| Mechanism of injury                |                                     |                                          | 0.01                  |
| Fall                               | 36 (28%)                            | 5 (14%)                                  |                       |
| Motor vehicle accident             | 34 (26%)                            | 13 (36%)                                 |                       |
| Auto-pedestrian/bike               | 16 (12%)                            | 4 (11%)                                  |                       |
| Bicycle, skateboard, scooter       | 21 (16%)                            | 4 (11%)                                  |                       |
| ATV                                | 9 (7%)                              | 0                                        |                       |
| Other blunt                        | 12 (9%)                             | 5 (14%)                                  |                       |
| Penetrating                        | 2 (2%)                              | 1 (3%)                                   |                       |
| Unknown                            | 1 (1%)                              | 4 (11%)                                  |                       |

**Supplementary Table S2.** Details of Principle Components Analysis.

| Measure                     | PCA Loading | Inclusion |
|-----------------------------|-------------|-----------|
| Combined WISC-V/WAIS-IV     | 0.74        | Retained  |
| Coding                      |             |           |
| Combined WISC-V/WAIS-IV     | 0.73        | Retained  |
| Symbol Search               |             |           |
| Combined WAIS-IV Digit Span | 0.62        | Retained  |
| and CMS numbers             |             |           |
| DKEFS Trails 4 Switching    | 0.80        | Retained  |
| DKEFS Phonemic Verbal       | 0.71        | Retained  |
| Fluency                     |             |           |
| DKEFS Category Fluency      | 0.80        | Retained  |
| CHAMP Lists Immediate       | 0.77        | Retained  |
| CHAMP Lists Delayed         | 0.74        | Retained  |

Principle components analysis performed on N = 79 patients with complete data in all variables. Combining all participant data yielded a single component solution accounting for 54.7% of the total explained variance. Reasons for missing data in cognitive assessments included complications such as orthopedic injury, vision impairment, and behavioral cooperation precluding completion of some tasks; also, the need for virtual only visits for some patients assessed during the COVID-19 pandemic.

**Supplementary Table S3.** Average cognitive outcomes and brain injury severity assigned by the Glasgow Coma Scale.

|                                       | <b>All<br/>Mean (SD)</b> | <b>Mild<br/>Mean (SD)</b> | <b>Mild Complicated<br/>Mean (SD)</b> | <b>Moderate<br/>Mean (SD)</b> | <b>Severe<br/>Mean (SD)</b> | <b><i>p</i>-value<br/>(ANOVA)</b> |
|---------------------------------------|--------------------------|---------------------------|---------------------------------------|-------------------------------|-----------------------------|-----------------------------------|
| BRIEF-GEC, N = 100                    | 53.89 (12.43)            | 53.27 (11.85)             | 53.31 (13.39)                         | 53.50 (14.28)                 | 59.78 (10.15)               | 0.53                              |
| Neurocognitive Index, N = 79          | -0.46 (1.01)             | 0.004 (0.99)              | -0.004 (1.05)                         | -0.32 (1.0)                   | -0.16 (1.10)                | 0.87                              |
| Numbers combined, N = 108             | 8.40 (2.73)              | 8.81 (2.53)               | 7.87 (2.59)                           | 8.30 (2.98)                   | 8.50 (3.68)                 | 0.47                              |
| Lists Immediate, N = 110              | 8.50 (2.70)              | 8.33 (2.41)               | 8.98 (2.60)                           | 6.67 (2.61)                   | 9.42 (3.45)                 | 0.04                              |
| Lists Delayed, N = 111                | 8.60 (3.29)              | 8.67 (3.07)               | 9.15 (3.07)                           | 7.67 (3.50)                   | 7.50 (4.44)                 | 0.33                              |
| DKEFS number letter switching, N = 85 | 7.21 (4.05)              | 7.37 (4.37)               | 7.85 (3.74)                           | 6.13 (3.87)                   | 6.00 (3.84)                 | 0.50                              |
| DKEFS category fluency, N = 88        | 9.69 (3.53)              | 10.08 (3.31)              | 10.14 (3.44)                          | 8.56 (4.19)                   | 8.38 (3.80)                 | 0.31                              |
| DKEFS letter fluency, N = 87          | 8.14 (2.81)              | 8.29 (2.75)               | 8.85 (2.85)                           | 6.33 (2.69)                   | 7.46 (2.60)                 | 0.10                              |
| Combined coding, N = 105              | 8.31 (3.09)              | 8.62 (3.31)               | 8.36 (3.10)                           | 8.33 (3.20)                   | 7.00 (1.91)                 | 0.46                              |
| Combined symbol search, N = 105       | 9.59 (3.39)              | 9.76 (3.26)               | 9.78 (4.03)                           | 9.08 (2.11)                   | 8.92 (2.97)                 | 0.82                              |
| Word reading, N = 111                 | 97.97 (16.02)            | 97.30 (13.56)             | 100.44 (17.90)                        | 91.50 (9.83)                  | 98.67 (22.14)               | 0.39                              |
| SDSC Domain T-score, N = 131          |                          |                           |                                       |                               |                             |                                   |
| Total score                           | 56.92 (13.67)            | 57.61 (14.83)             | 57.92 (12.53)                         | 53.25 (16.76)                 | 53.86 (9.57)                | 0.58                              |
| Initiation and maintenance            | 62.97 (16.12)            | 63.61 (15.95)             | 64.16 (16.37)                         | 58.00 (14.45)                 | 60.50 (14.45)               | 0.61                              |
| Breathing                             | 50.47 (9.98)             | 50.57 (10.33)             | 49.80 (8.61)                          | 50.83 (6.95)                  | 52.07 (15.01)               | 0.90                              |
| Arousal                               | 54.48 (14.53)            | 55.52 (14.99)             | 56.59 (16.78)                         | 48.83 (4.28)                  | 47.79 (2.94)                | 0.11                              |
| Sleep wake transition                 | 54.89 (14.76)            | 55.20 (15.36)             | 56.33 (15.25)                         | 52.42 (15.11)                 | 50.71 (9.73)                | 0.59                              |
| Excessive somnolence                  | 49.67 (8.42)             | 49.91 (9.64)              | 49.78 (7.34)                          | 48.83 (9.66)                  | 49.07 (6.06)                | 0.97                              |
| Hyperhidrosis                         | 49.50 (8.56)             | 50.38 (10.06)             | 49.00 (7.42)                          | 48.08 (7.57)                  | 48.93 (7.00)                | 0.77                              |

**Supplemental Table S4.** Correlation between cognitive outcomes, injury severity measures, and sleep subscale T-scores

|            | GEC   | NCI    | Numbers<br>combined | Lists<br>immediate | Lists<br>delay | DKEFS<br>number<br>letter<br>switch | DKEFS<br>category<br>fluency | DKEFS<br>letter<br>fluency | Coding | Symbol<br>search | Word<br>reading | GCS    | ISS    | AIS<br>head |
|------------|-------|--------|---------------------|--------------------|----------------|-------------------------------------|------------------------------|----------------------------|--------|------------------|-----------------|--------|--------|-------------|
| DIMS       | .48** | -.28*  | -.06                | -.11               | -.10           | -.20                                | -.18                         | .08                        | -.23*  | -.02             | -.10            | .11    | .11    | -.04        |
| SBD        | .20*  | -.20   | -.06                | -.15               | -.10           | -.17                                | -.19                         | -.15                       | -.06   | -.06             | -.11            | -.03   | -.03   | .10         |
| DA         | .27*  | -.06   | .05                 | .06                | .10            | .04                                 | -.05                         | -.01                       | .12    | .20*             | .05             | .19*   | .19    | -.002       |
| SWTD       | .33** | -.16   | -.10                | -.05               | -.06           | -.10                                | -.09                         | .10                        | -.02   | -.04             | -.001           | .04    | .04    | -.03        |
| DES        | .47** | -.31** | -.24*               | -.19*              | -.24*          | -.14                                | -.16                         | -.06                       | -.14   | -.08             | -.17            | -.05   | -.05   | .01         |
| SH         | .27** | -.34** | -.13                | -.19*              | -.16           | -.28*                               | -.21*                        | -.16                       | -.28** | -.12             | -.22*           | .12    | .12    | -.09        |
| SDSC Total | .52** | -.33** | -.12                | -.10               | -.13           | -.21                                | -.20                         | .04                        | -.18   | -.05             | -.09            | .07    | .07    | .02         |
| GCS        | -.16  | .10    | .03                 | .03                | .19            | .20                                 | .23*                         | .16                        | .17    | .14              | .11             | --     | -.37** | -.33**      |
| ISS        | .20*  | -.18   | -.15                | -.09               | -.13           | -.24*                               | -.31**                       | -.11                       | -.11   | -.11             | -.02            | -.37** | --     | .75**       |
| AIS head   | .13   | .04    | .03                 | .14                | .10            | .002                                | -.08                         | .02                        | .11    | -.004            | .14             | -.33** | .75**  | --          |

Spearman correlation coefficients. \*Significant at  $p < 0.05$ , \*\*Significant at  $p < 0.01$ .

Sleep Disturbances Scale for Children (SDSC) Domain T-scores used. DIMS: Disorders of Initiation and Maintenance domain; SBD: Sleep breathing disorders domain; DA: Disorders of arousal domain; SWTD: Sleep wake transition disorder domain; DES: Disorders of excessive somnolence domain; SH: Sleep hyperhidrosis domain; SDSC Total: Sleep Disturbances Scale for Children total score

GEC: Global Executive Composite; NCI: Neurocognitive Index; DKEFS: Delis Kaplan Executive Function System

GCS: Glasgow Coma Scale; ISS: Injury Severity Score; AIS: Abbreviated Injury Scale.
